# Supplementary material for: Subtypes of Alzheimer's Disease Display Distinct Network Abnormalities Extending Beyond Their Pattern of Brain Atrophy
Source: PubMed Central journal article supplement (PMC6547836; doi:10.3389/fneur.2019.00524), 2019-05-28
Supplement: Data_Sheet_1.pdf [file Data_Sheet_1.pdf]

## SUPPLEMENTARY MATERIAL

**Supplementary Table 1. Brain modules in healthy controls and the subtypes of Alzheimer's disease**

AD = Alzheimer's disease.

| Hemisphere | Brain region               | Healthy controls | Typical AD | Limbic-predominant | Hippocampal-sparing | Minimal atrophy AD |
|------------|----------------------------|------------------|------------|--------------------|---------------------|--------------------|
| Left       | Superior frontal           | III              | I          | III                | III                 | III                |
| Left       | Frontal pole               | I                | II         | I                  | I                   | II                 |
| Left       | Rostral middle frontal     | I                | I          | I                  | I                   | I                  |
| Left       | Caudal middle frontal      | I                | I          | III                | III                 | III                |
| Left       | Pars orbitalis             | I                | I          | I                  | I                   | I                  |
| Left       | Lateral orbito frontal     | II               | I          | II                 | I                   | I                  |
| Left       | Pars triangularis          | I                | I          | I                  | I                   | I                  |
| Left       | Pars opercularis           | I                | I          | I                  | I                   | III                |
| Left       | Medial orbito frontal      | II               | I          | II                 | I                   | I                  |
| Left       | Rostral anterior cingulate | I                | II         | II                 | I                   | I                  |
| Left       | Caudal anterior cingulate  | II               | II         | II                 | I                   | I                  |
| Left       | Insula                     | II               | II         | I                  | I                   | I                  |
| Left       | Precentral                 | III              | I          | III                | III                 | III                |
| Left       | Postcentral                | III              | I          | III                | III                 | III                |
| Left       | Supramarginal              | I                | I          | III                | III                 | III                |
| Left       | Superior parietal          | III              | I          | III                | III                 | III                |
| Left       | Inferior parietal          | III              | I          | III                | III                 | III                |
| Left       | Paracentral                | III              | I          | II                 | III                 | III                |
| Left       | Posterior cingulate        | II               | II         | II                 | I                   | I                  |
| Left       | Isthmus cingulate          | II               | II         | II                 | III                 | III                |
| Left       | Precuneus                  | III              | I          | III                | III                 | III                |
| Left       | Cuneus                     | III              | II         | II                 | III                 | III                |
| Left       | Pericalcarine              | III              | II         | II                 | III                 | III                |
| Left       | Lingual                    | III              | II         | II                 | III                 | III                |
| Left       | Lateral occipital          | III              | I          | II                 | III                 | III                |
| Left       | Transverse temporal        | I                | I          | I                  | I                   | III                |
| Left       | Temporal banks             | III              | I          | I                  | I                   | III                |
| Left       | Superior temporal          | III              | I          | I                  | I                   | III                |
| Left       | Middle temporal            | II               | I          | I                  | I                   | III                |
| Left       | Inferior temporal          | II               | I          | I                  | I                   | II                 |
| Left       | Temporal pole              | II               | II         | I                  | I                   | II                 |
| Left       | Entorhinal                 | II               | II         | I                  | IV                  | II                 |
| Left       | Parahippocampal            | II               | II         | I                  | IV                  | II                 |
| Left       | Fusiform                   | II               | I          | I                  | III                 | III                |
| Left       | Thalamus                   | I                | II         | I                  | I                   | IV                 |
| Left       | Caudate                    | I                | II         | II                 | II                  | II                 |
| Left       | Putamen                    | I                | II         | I                  | II                  | II                 |
| Left       | Pallidum                   | I                | II         | I                  | II                  | II                 |
| Left       | Hippocampus                | I                | II         | I                  | IV                  | II                 |
| Left       | Amygdala                   | I                | II         | I                  | IV                  | II                 |
| Left       | Accumbens                  | I                | II         | I                  | I                   | II                 |
| Right      | Superior frontal           | I                | I          | III                | III                 | I                  |
| Right      | Frontal pole               | I                | II         | I                  | I                   | II                 |
| Right      | Rostral middle frontal     | I                | I          | II                 | I                   | I                  |
| Right      | Caudal middle frontal      | I                | I          | III                | III                 | III                |
| Right      | Pars orbitalis             | I                | I          | II                 | I                   | I                  |

|       |                            |     |    |     |     |     |
|-------|----------------------------|-----|----|-----|-----|-----|
| Right | Lateral orbito frontal     | II  | I  | II  | I   | I   |
| Right | Pars triangularis          | I   | I  | III | I   | I   |
| Right | Pars opercularis           | I   | I  | II  | I   | III |
| Right | Medial orbito frontal      | II  | II | II  | I   | I   |
| Right | Rostral anterior cingulate | II  | II | I   | I   | I   |
| Right | Caudal anterior cingulate  | II  | II | II  | I   | I   |
| Right | Insula                     | II  | II | III | I   | II  |
| Right | Precentral                 | III | I  | III | III | III |
| Right | Postcentral                | III | I  | III | III | III |
| Right | Supramarginal              | III | I  | III | I   | III |
| Right | Superior parietal          | III | I  | III | III | III |
| Right | Inferior parietal          | III | I  | III | III | III |
| Right | Paracentral                | III | I  | III | III | III |
| Right | Posterior cingulate        | II  | II | II  | I   | I   |
| Right | Isthmus cingulate          | II  | II | II  | III | III |
| Right | Precuneus                  | III | I  | III | III | III |
| Right | Cuneus                     | III | II | III | III | III |
| Right | Pericalcarine              | III | II | II  | III | III |
| Right | Lingual                    | III | II | II  | III | III |
| Right | Lateral occipital          | III | I  | III | III | III |
| Right | Transverse temporal        | I   | I  | III | I   | III |
| Right | Temporal banks             | III | I  | III | II  | I   |
| Right | Superior temporal          | I   | I  | III | I   | II  |
| Right | Middle temporal            | II  | I  | III | I   | I   |
| Right | Inferior temporal          | II  | I  | III | I   | II  |
| Right | Temporal pole              | II  | II | II  | I   | II  |
| Right | Entorhinal                 | II  | II | III | IV  | II  |
| Right | Parahippocampal            | II  | II | III | IV  | II  |
| Right | Fusiform                   | II  | I  | III | III | II  |
| Right | Thalamus                   | I   | II | II  | II  | IV  |
| Right | Caudate                    | I   | II | II  | II  | II  |
| Right | Putamen                    | I   | II | II  | II  | II  |
| Right | Pallidum                   | I   | II | I   | IV  | II  |
| Right | Hippocampus                | I   | II | III | IV  | II  |
| Right | Amygdala                   | I   | II | III | IV  | II  |
| Right | Accumbens                  | I   | II | I   | II  | II  |

**Supplementary Table 2. Results on nodal global efficiency from FDR-corrected one-tailed t-tests**

A = auditory network; AD = Alzheimer's disease; DA = dorsal attention network; DMN = default-mode network; EC = executive control; F-P = fronto-parietal network; LV = lateral visual (also known as secondary visual); MV = medial visual (also known as primary visual); S = salience network; S-M = sensory-motor network; VA = ventral attention network.

| Region                          | Brain network           | Healthy controls        | Typical AD                 | FDR-corrected p-value |
|---------------------------------|-------------------------|-------------------------|----------------------------|-----------------------|
| Left superior frontal           | F-P (also S, DA/VA)     | 0.345                   | 0.667                      | 0.007                 |
| Left cuneus                     | MV                      | 0.019                   | 0.585                      | 0.007                 |
| Left pericalcarine              | MV                      | 0.025                   | 0.604                      | 0.007                 |
| Left lingual                    | MV                      | 0.360                   | 0.653                      | 0.007                 |
| Left caudal anterior cingulate  | DMN (also S, EC, F-P)   | 0                       | 0.548                      | 0.007                 |
| Left caudal middle frontal      | DMN (also S, EC, F-P)   | 0.687                   | 0.578                      | 0.007                 |
| Left superior temporal          | A                       | 0.211                   | 0.603                      | 0.007                 |
| Right rostral middle frontal    | F-P (also S, EC, DA/VA) | 0.706                   | 0.537                      | 0.007                 |
| Right superior temporal         | A                       | 0.726                   | 0.607                      | 0.007                 |
| Right isthmus cingulate         | DMN                     | 0                       | 0.657                      | 0.007                 |
| Right cuneus                    | MV                      | 0                       | 0.604                      | 0.007                 |
| Right pericalcarine             | MV                      | 0.185                   | 0.526                      | 0.007                 |
| Right lingual                   | MV                      | 0                       | 0.627                      | 0.007                 |
|                                 |                         | <b>Healthy controls</b> | <b>Limbic-predominant</b>  |                       |
| Left superior frontal           | F-P (also S, DA/VA)     | 0.345                   | 0.724                      | <0.001                |
| Left rostral anterior cingulate | DMN (also S, EC, F-P)   | 0.610                   | 0                          | <0.001                |
| Right lateral occipital         | LV                      | 0.314                   | 0.702                      | <0.001                |
|                                 |                         | <b>Healthy controls</b> | <b>Hippocampal-sparing</b> |                       |
| Left superior frontal           | F-P (also S, DA/VA)     | 0.345                   | 0.711                      | <0.001                |
| Left lateral occipital          | LV                      | 0.366                   | 0.629                      | <0.001                |
| Right superior frontal          | F-P (also S, DA/VA)     | 0.625                   | 0.715                      | <0.001                |
|                                 |                         | <b>Healthy controls</b> | <b>Minimal atrophy AD</b>  |                       |
| Left superior frontal           | F-P (also S, DA/VA)     | 0.345                   | 0.704                      | 0.003                 |
| Left posterior cingulate        | DMN (also S)            | 0.406                   | 0.687                      | 0.003                 |
| Left precuneus                  | DMN                     | 0.443                   | 0.689                      | 0.003                 |
| Left superior parietal          | F-P (also DA)           | 0.438                   | 0.663                      | 0.003                 |
| Right superior frontal          | F-P (also S, DA/VA)     | 0.625                   | 0.710                      | 0.003                 |
| Right lateral occipital         | LV                      | 0.314                   | 0.650                      | 0.003                 |
| Right paracentral               | S-M                     | 0.437                   | 0.673                      | 0.003                 |
| Right fusiform                  | LV                      | 0.530                   | 0.698                      | 0.003                 |
| Right superior parietal         | F-P (also DA)           | 0.457                   | 0.654                      | 0.003                 |

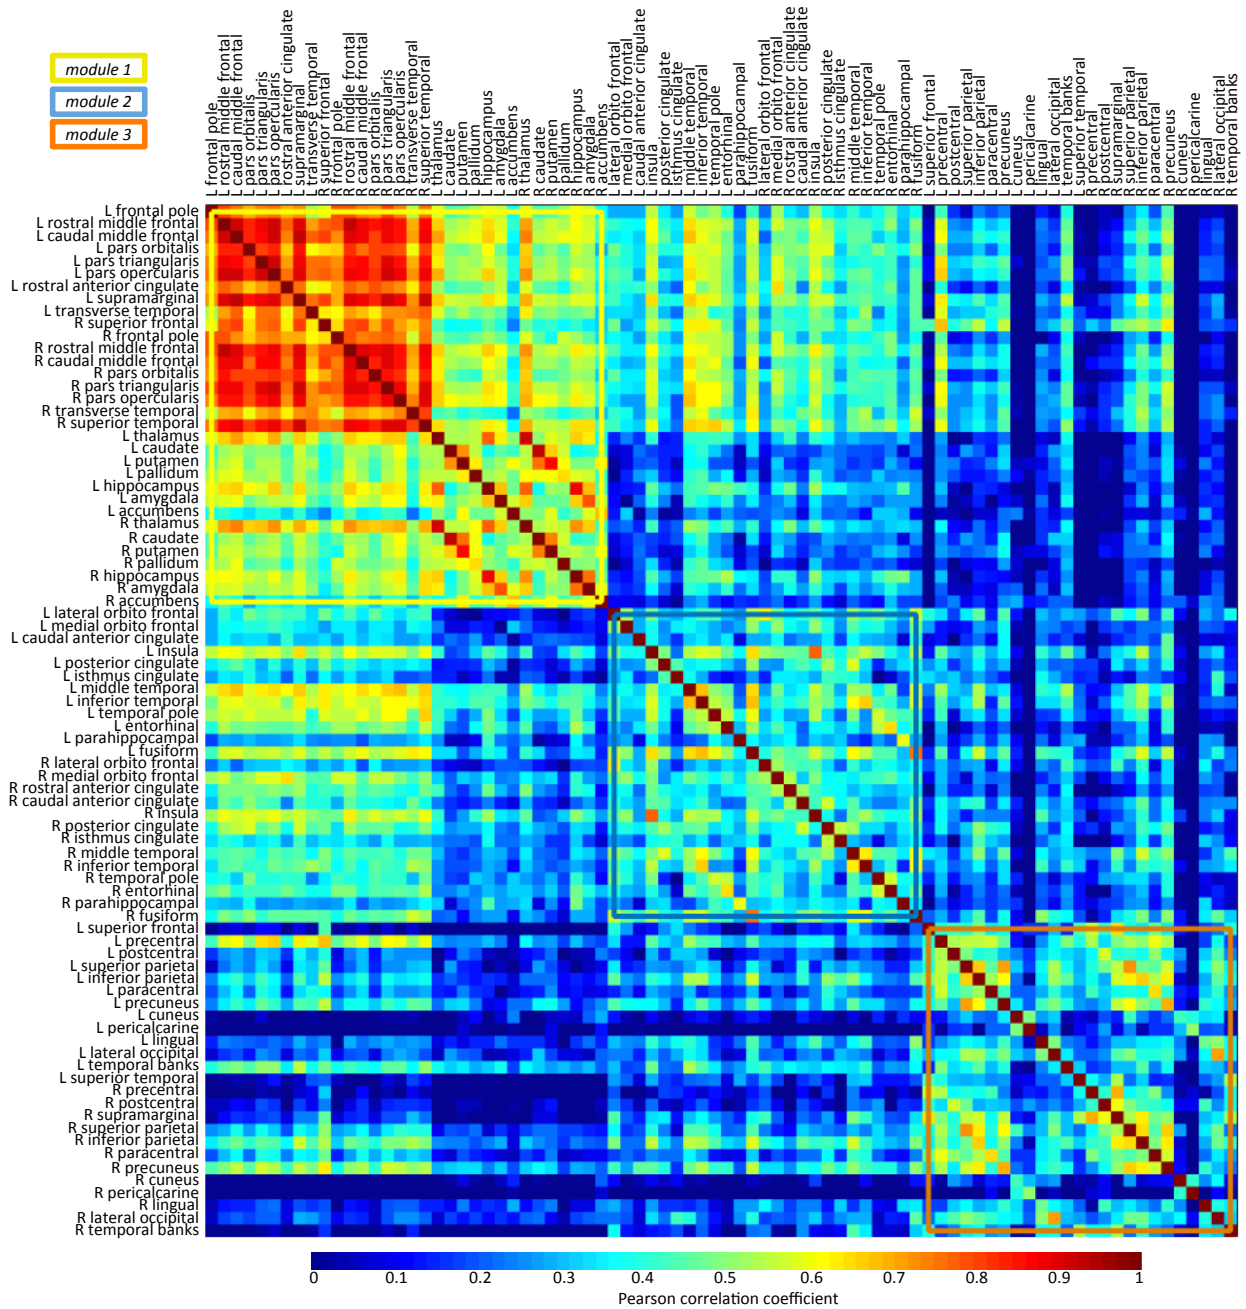

**Supplementary Figure 1. Weighted correlation matrix (healthy controls).** The brain regions were ordered by the brain modules identified in the healthy controls (Table 2 and Fig. 3 in the main text). The yellow square (upper-left corner) indicates the brain regions belonging to module 1. The blue square (center) indicates the brain regions belonging to module 2. The orange square (bottom-right corner) indicates the brain regions belonging to module 3.

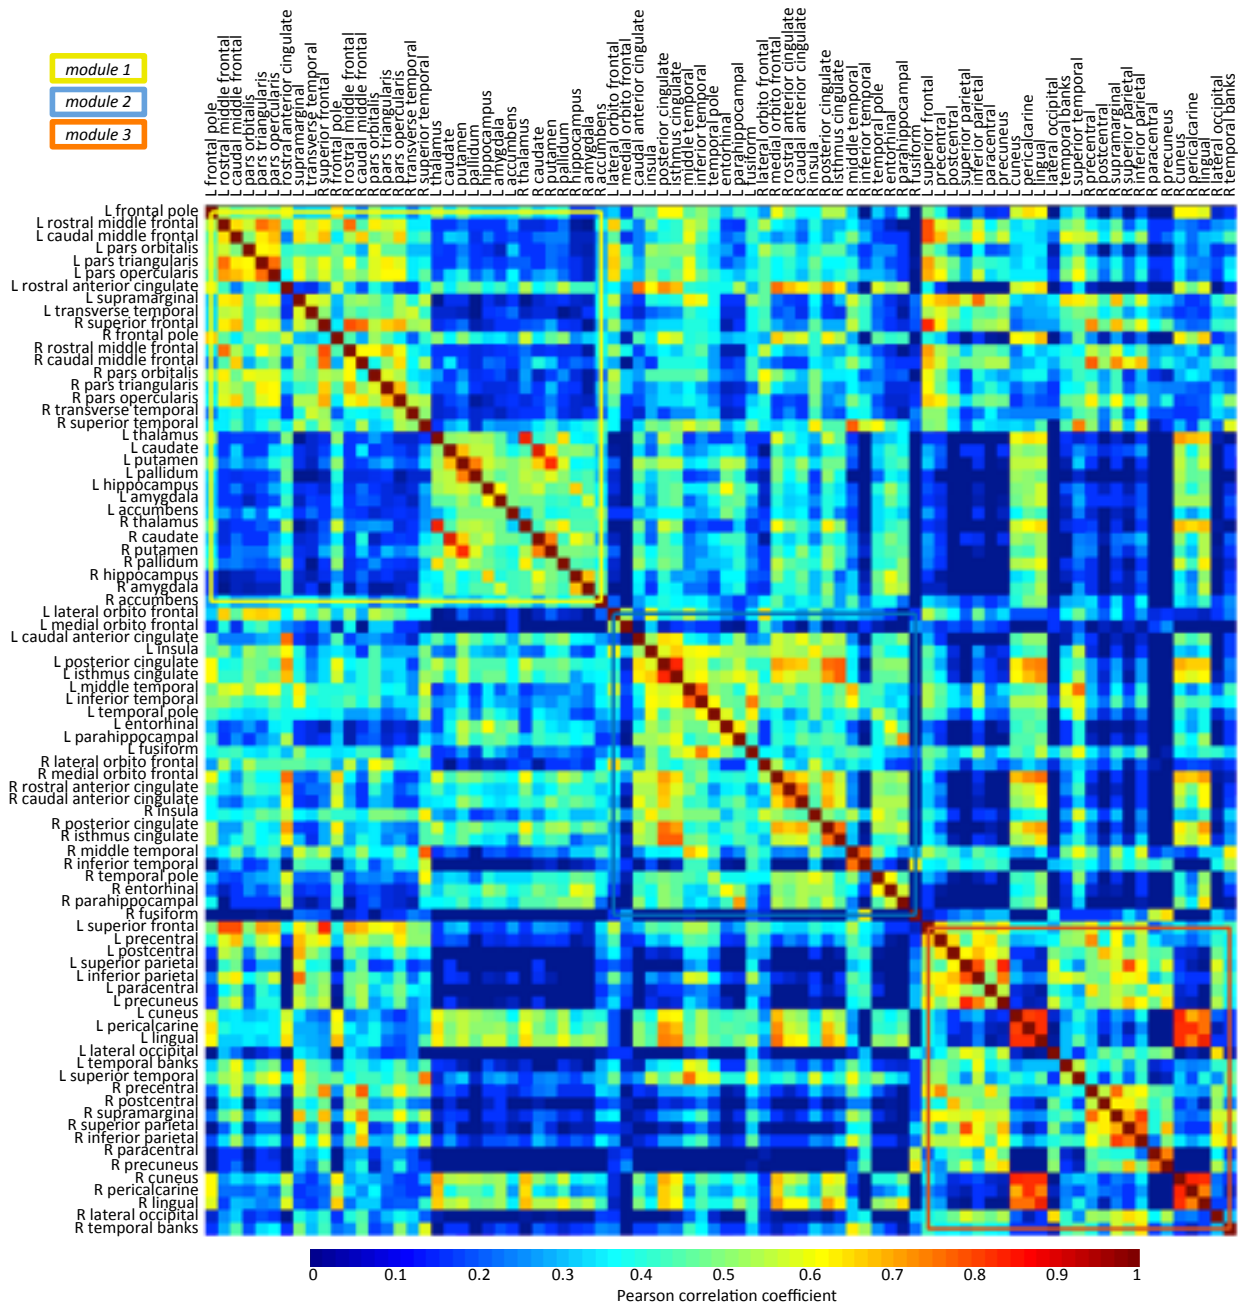

**Supplementary Figure 2. Weighted correlation matrix (Typical AD).** The brain regions were ordered by the brain modules identified in the healthy controls (Table 2 and Figure 3 in the main text). The yellow square (upper-left corner) indicates the brain regions belonging to module 1. The blue square (center) indicates the brain regions belonging to module 2. The orange square (bottom-right corner) indicates the brain regions belonging to module 3.

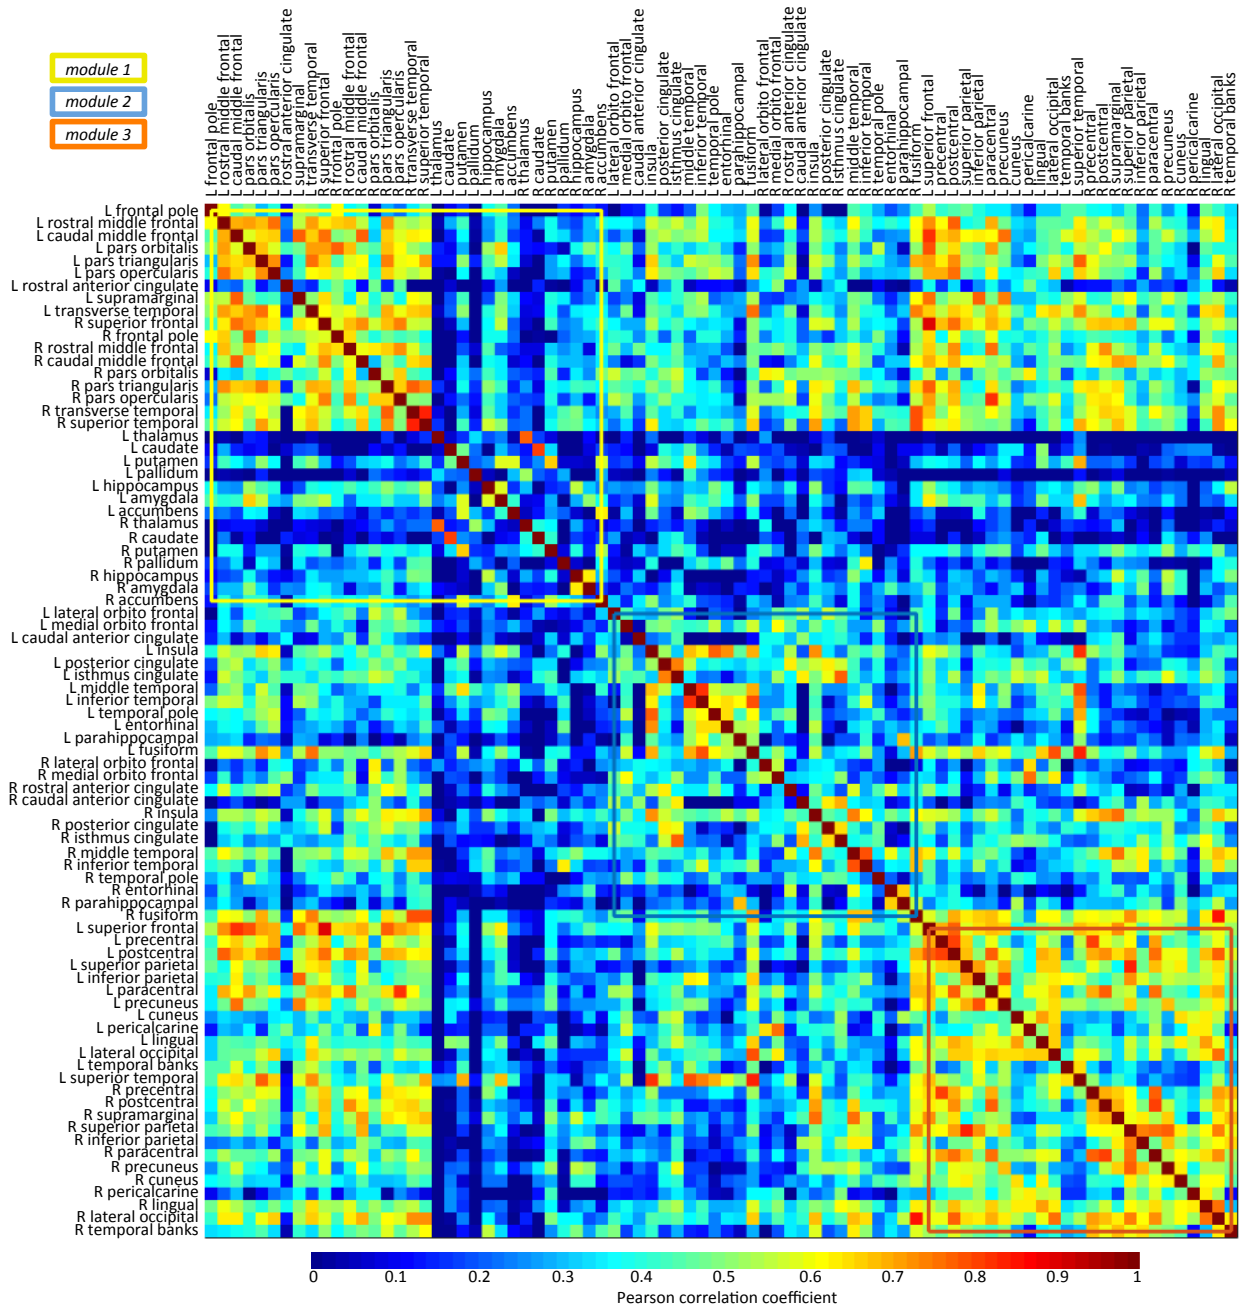

**Supplementary Figure 3. Weighted correlation matrix (Limbic-predominant AD).** The brain regions were ordered by the brain modules identified in the healthy controls (Table 2 and Figure 3 in the main text). The yellow square (upper-left corner) indicates the brain regions belonging to module 1. The blue square (center) indicates the brain regions belonging to module 2. The orange square (bottom-right corner) indicates the brain regions belonging to module 3.

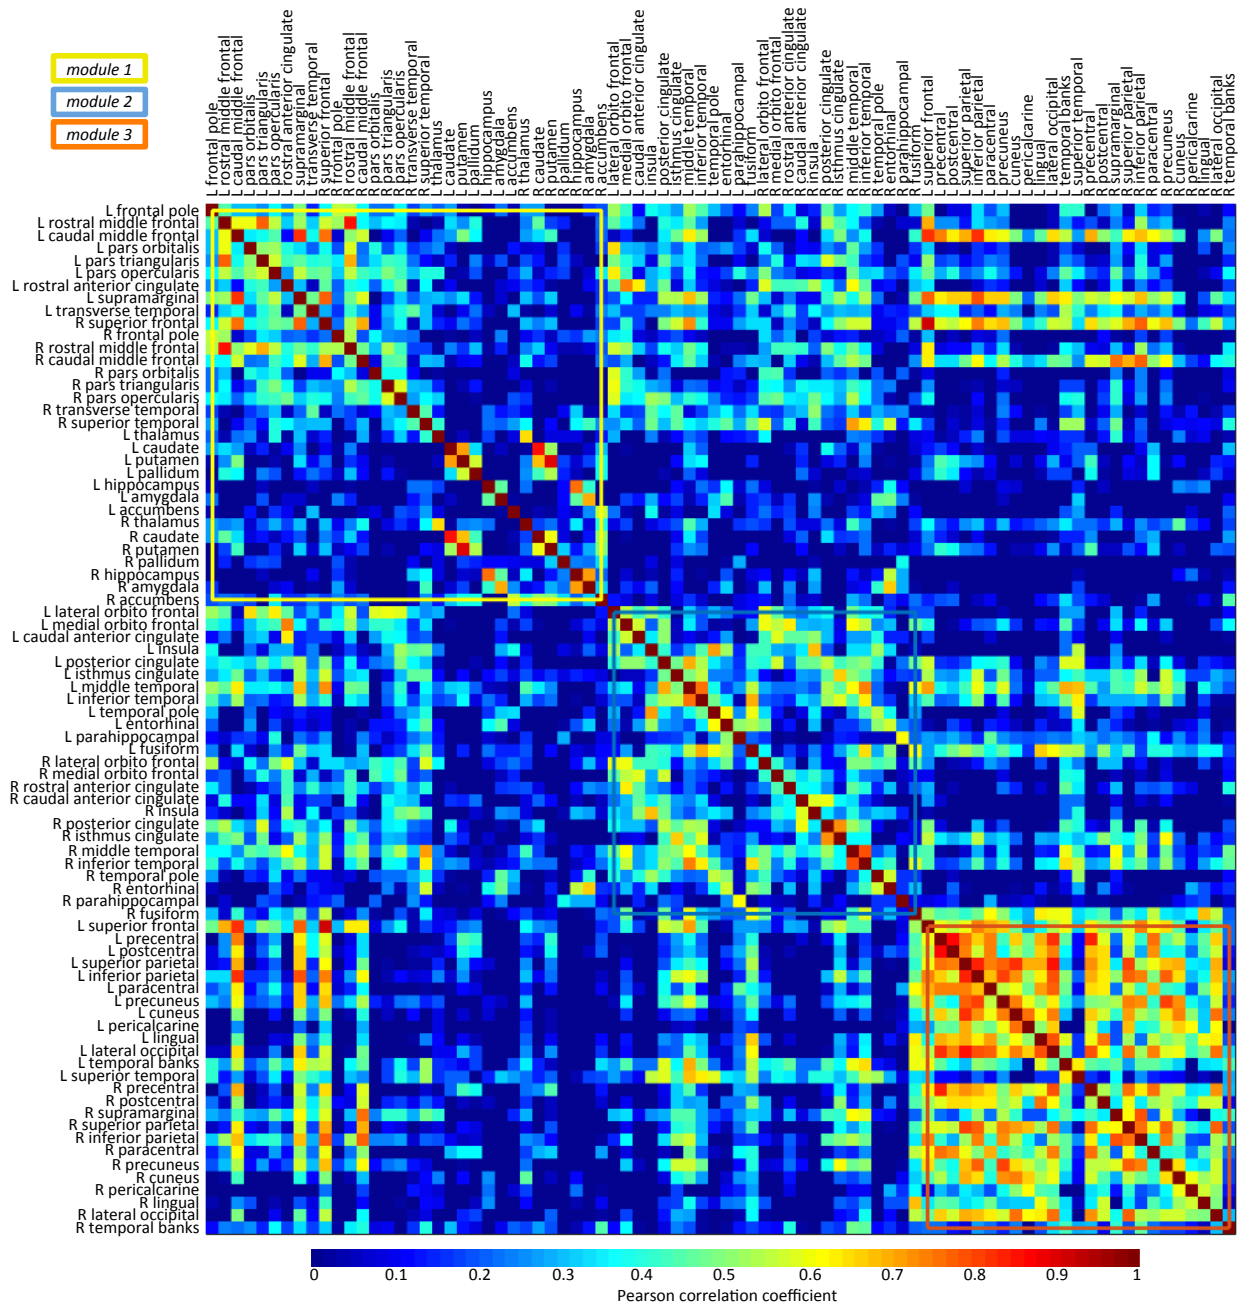

**Supplementary Figure 4. Weighted correlation matrix (Hippocampal-sparing AD).** The brain regions were ordered by the brain modules identified in the healthy controls (Table 2 and Figure 3 in the main text). The yellow square (upper-left corner) indicates the brain regions belonging to module 1. The blue square (center) indicates the brain regions belonging to module 2. The orange square (bottom-right corner) indicates the brain regions belonging to module 3.

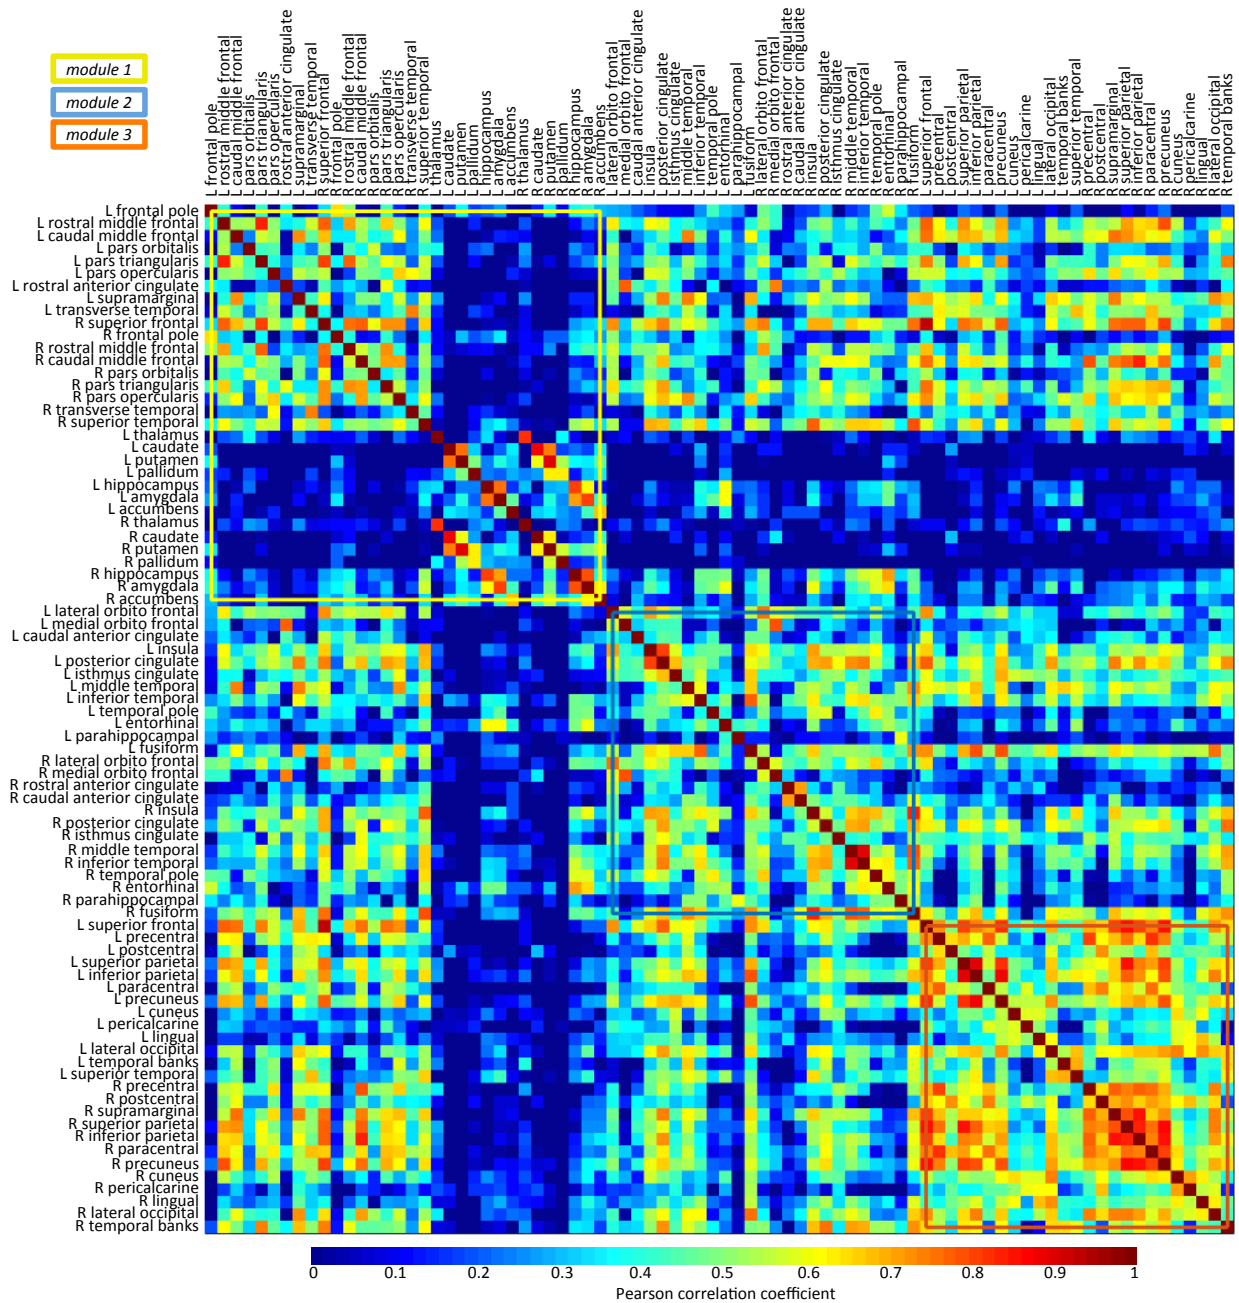

**Supplementary Figure 5. Weighted correlation matrix (Minimal atrophy AD).**

The brain regions were ordered by the brain modules identified in the healthy controls (Table 2 and Figure 3 in the main text). The yellow square (upper-left corner) indicates the brain regions belonging to module 1. The blue square (center) indicates the brain regions belonging to module 2. The orange square (bottom-right corner) indicates the brain regions belonging to module 3.
